# Supplementary material
Source: publisher figshare collection journal article supplement (https://frontiersin.figshare.com/ndownloader/files/20132315)
Supplement: Supplementary file [file 20132315]

## Supplementary Material

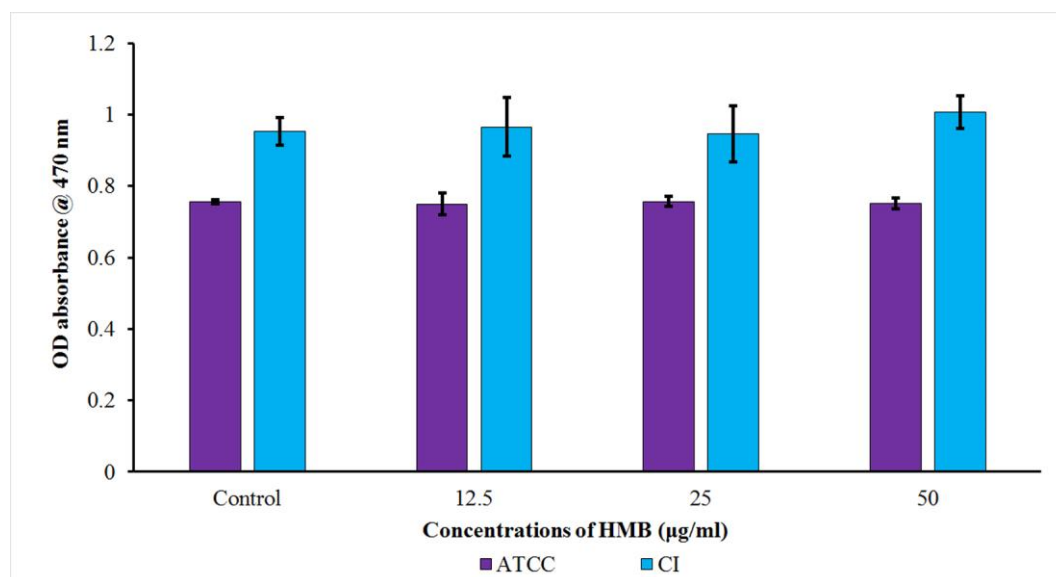

**Figure S1** Effect of HMB on metabolic viability of *P. mirabilis* ATCC and CI strains.

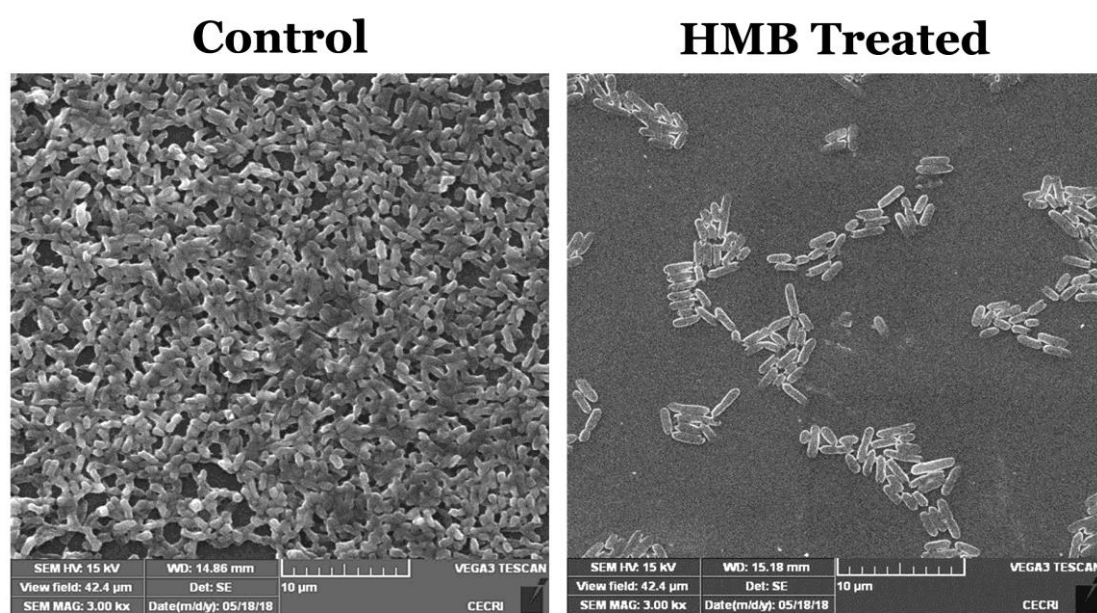

**Figure S2** FESEM analysis of *P. mirabilis* biofilm under HMB treatment at MBIC (scale bar—10 µm)
